# Supplementary material for: Severity and management of postabortion complications among women in Zimbabwe, 2016: a cross-sectional study
Source: PubMed Central journal article supplement — BMJ Open. 2018 Feb 10;8(2):e019658. doi: 10.1136/bmjopen-2017-019658 (PMC5829940; doi:10.1136/bmjopen-2017-019658), 2018-02-10
Supplement: bmjopen-2017-019658supp001.pdf [file bmjopen-2017-019658supp001.pdf]

*Severity of abortion complications in Zimbabwe*

**Supplemental Figure 1. Severity Classification, Zimbabwe 2016, Prospective Morbidity Study**

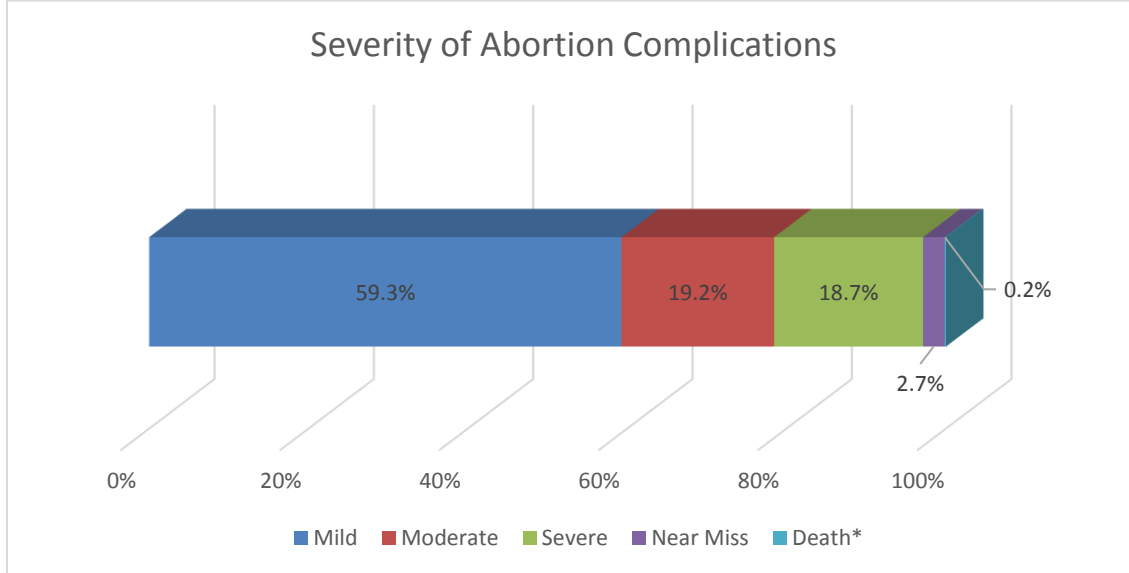

\* There were 2 additional deaths during the study period that were recorded in tracking forms at facilities but no data was collected on these women. There were also 12 reported near-misses in the tracking forms but no data was collected on these women as they were too sick to consent. The near-misses reported on the tracking forms are likely an overestimate as they are based only on provider reports, rather than a clinical assessment. Of those classified as near-miss by the provider in the sample, only 10% (n=9) were objectively classified as near-miss based on the clinical criteria. Therefore, due to over-reporting, it is likely the facility reported near-misses is actually just 1 case (10% of 12).

*Severity of abortion complications in Zimbabwe*

**Supplemental Table 1. Distribution of eligible, sampled, and participating facilities, Zimbabwe 2016, Prospective Morbidity Survey**

| Facility type                               | Facility Level                |            |                                   |               |                          | Individual Level (unweighted) |                                   |                            |                     |
|---------------------------------------------|-------------------------------|------------|-----------------------------------|---------------|--------------------------|-------------------------------|-----------------------------------|----------------------------|---------------------|
|                                             | # facilities that provide PAC | % sampled  | # sampled facilities <sup>a</sup> | Response rate | # interviewed facilities | Total Number of Cases         | Eligible respondents <sup>b</sup> | Response rate <sup>c</sup> | # interviewed women |
| Primary health center (public)              | 63                            | 30%        | 18                                | 100%          | 18                       | 14                            | 13                                | 100%                       | 13                  |
| District/general/mission hospital (public)  | 91                            | 52%        | 47                                | 100%          | 47                       | 312                           | 276                               | 99%                        | 274                 |
| Provincial hospital (public)                | 8                             | 100%       | 8                                 | 100%          | 8                        | 231                           | 217                               | 99.5%                      | 216                 |
| Central hospital (public)                   | 5                             | 100%       | 5                                 | 100%          | 5                        | 444                           | 374                               | 100%                       | 374                 |
| Private hospitals                           | 40                            | 77%        | 27                                | 96%           | 26                       | 121                           | 103                               | 96%                        | 99                  |
| NGO facility (for profit or not-for-profit) | 38                            | 68%        | 28                                | 82%           | 23                       | 61                            | 35                                | 74%                        | 26                  |
| <b>Total</b>                                | <b>245</b>                    | <b>56%</b> | <b>133</b>                        | <b>95%</b>    | <b>127</b>               | <b>1183</b>                   | <b>1018</b>                       | <b>98%</b>                 | <b>1002</b>         |

- a) Ten facilities were not eligible for the study as they did not have the capacity to provide post-abortion care. Facilities were added to the PMS after sampling to adjust for misclassification by province. In provinces in which facilities had been misclassified, we sampled 100% of facilities at the level where misclassification occurred.
- b) Ineligible respondents include patients that interviewers missed in the facility, near-misses who were too sick to be interviewed, or maternal deaths. One respondent was ineligible as she had pseudocyesis (a pseudo-pregnancy), and therefore did not meet eligibility criteria of having an abortion complication.
- c) Of the 1018 eligible respondents, 16 respondents refused to be interviewed.
- d) The sample was stratified by province and facility type so the total sampling proportion does not add up to a round proportion nationally. We sampled 100% of the central hospitals, provincial hospitals and not-for-profit NGO facilities, and 50% of district hospitals. For primary health centers we sampled 50% in Matabeleland South and Matabeleland North. In Manicaland there were more primary health centers with post-abortion care capacity (N=43), so only 20% of primary health centers were sampled in this province. There were two levels of private facilities (lower and higher levels), so we sampled 100% of high-level private facilities (operating with a similar capacity to provincial hospitals) and 50% of lower-level private facilities and for-profit NGO facilities (operating at a level similar to district hospitals). This table collapses categories of facilities to ensure that no individual facility could be identified.

*Severity of abortion complications in Zimbabwe*

**Supplemental Table 2. Sociodemographic and reproductive characteristics of women seeking post-abortion care, Zimbabwe 2016, Prospective Morbidity Survey**

| Characteristic                                                                   | Total      |      | Residence |           | p-value |
|----------------------------------------------------------------------------------|------------|------|-----------|-----------|---------|
|                                                                                  | Weighted N | %    | Urban (%) | Rural (%) |         |
| TOTAL                                                                            | 1302       | 100% | 60%       | 40%       |         |
| <b>Age</b>                                                                       |            |      |           |           | 0.00    |
| 15-19                                                                            | 155        | 12%  | 8%        | 17%       |         |
| 20-24                                                                            | 287        | 22%  | 23%       | 21%       |         |
| 25-29                                                                            | 307        | 24%  | 24%       | 23%       |         |
| 30-34                                                                            | 299        | 23%  | 25%       | 20%       |         |
| 35+                                                                              | 249        | 19%  | 19%       | 20%       |         |
| <b>Marital status<sup>a</sup></b>                                                |            |      |           |           | 0.01    |
| In union                                                                         | 1027       | 80%  | 78%       | 83%       |         |
| Not in union                                                                     | 257        | 20%  | 22%       | 17%       |         |
| <b>Educational level</b>                                                         |            |      |           |           | 0.00    |
| No education                                                                     | 9          | 1%   | 0%        | 1%        |         |
| Any primary schooling                                                            | 184        | 14%  | 7%        | 25%       |         |
| Any secondary schooling                                                          | 927        | 71%  | 74%       | 68%       |         |
| University or more                                                               | 177        | 14%  | 19%       | 6%        |         |
| <b>Religion</b>                                                                  |            |      |           |           | 0.00    |
| Apostolic                                                                        | 431        | 33%  | 24%       | 48%       |         |
| Pentecostal                                                                      | 374        | 29%  | 35%       | 20%       |         |
| Protestant                                                                       | 194        | 15%  | 16%       | 13%       |         |
| Catholics/other Christian/Muslim/other                                           | 261        | 20%  | 23%       | 16%       |         |
| None                                                                             | 36         | 3%   | 2%        | 3%        |         |
| <b>Work status</b>                                                               |            |      |           |           | 0.00    |
| Unemployed, unpaid family worker/housewife, or student                           | 816        | 63%  | 54%       | 77%       |         |
| Full-time, part-time, or self-employed worker                                    | 479        | 37%  | 46%       | 23%       |         |
| <b>Relative wealth quintile (adjusted by urban/rural status)<sup>b</sup></b>     |            |      |           |           | 0.00    |
| Poorest                                                                          | 183        | 14%  | 17%       | 10%       |         |
| Poor                                                                             | 182        | 14%  | 14%       | 13%       |         |
| Medium                                                                           | 184        | 14%  | 16%       | 11%       |         |
| Wealthy                                                                          | 271        | 21%  | 22%       | 19%       |         |
| Wealthiest                                                                       | 482        | 37%  | 31%       | 47%       |         |
| <b>Number of living children</b>                                                 |            |      |           |           | 0.00    |
| None                                                                             | 364        | 28%  | 27%       | 29%       |         |
| 1-2                                                                              | 644        | 50%  | 55%       | 41%       |         |
| 3-4                                                                              | 259        | 20%  | 16%       | 26%       |         |
| 5+                                                                               | 29         | 2%   | 1%        | 3%        |         |
| <b>Region</b>                                                                    |            |      |           |           | 0.00    |
| Matabeleland (Bulawayo, Mat North, Mat South, Midlands)                          | 400        | 31%  | 33%       | 27%       |         |
| Mashonaland and Harare (Mash East, Mash West and Mash Central)                   | 643        | 49%  | 52%       | 46%       |         |
| South Eastern region (Manicaland and Masvingo)                                   | 259        | 20%  | 15%       | 27%       |         |
| <b>Intentions<sup>c</sup> related to pregnancy that resulted in seeking care</b> |            |      |           |           | 0.02    |
| Wanted then                                                                      | 900        | 70%  | 68%       | 72%       |         |
| Wanted later                                                                     | 192        | 15%  | 14%       | 16%       |         |
| Did not want at all                                                              | 188        | 15%  | 17%       | 12%       |         |
| Don't know                                                                       | 13         | 1%   | 1%        | 1%        |         |
| <b>Estimated gestational age</b>                                                 |            |      |           |           | 0.00    |
| First trimester                                                                  | 841        | 65%  | 69%       | 60%       |         |
| Second trimester <sup>d</sup>                                                    | 446        | 35%  | 31%       | 40%       |         |
| <b>Facility where post-abortion care was received</b>                            |            |      |           |           | 0.00    |
| Primary health center                                                            | 44         | 3%   | 2%        | 6%        |         |

## *Severity of abortion complications in Zimbabwe*

|                                             |     |     |     |     |  |
|---------------------------------------------|-----|-----|-----|-----|--|
| District/general/mission hospital           | 523 | 40% | 24% | 65% |  |
| Provincial hospital                         | 216 | 17% | 17% | 16% |  |
| Central hospital                            | 374 | 29% | 42% | 9%  |  |
| Private hospital                            | 115 | 9%  | 12% | 4%  |  |
| NGO facility (for profit or not-for-profit) | 30  | 2%  | 3%  | 1%  |  |

- a) In union indicates currently married or living together; not in union indicates never married, with partner and not living together, or separated/divorced/widowed.
- b) Wealth quintiles are relative to the national distribution of wealth in the country, as reported in the 2015 Zimbabwe DHS. The variable reported here is adjusted for differences in wealth between urban and rural individuals; that is, individuals in the "wealthiest" category who are urban are not equivalent to individuals in the "wealthiest" category who are rural.
- c) At the time of becoming pregnant.
- d) One respondent was at 28 weeks gestation, but is included in second trimester for analytical purposes.
